# Supplementary material for: Amniotic LPS-Induced Apoptosis in the Fetal Brain Is Suppressed by Vaginal LPS Preconditioning but Is Promoted by Continuous Ischemic Reperfusion
Source: MDPI journal article supplement (doi:10.3390/ijms23031787), 2022-02-04
Supplement: s1 [file s1]

# Supplementary Figure S1

P-Stat3

Area      1                      2                      3                      4                      5                      6

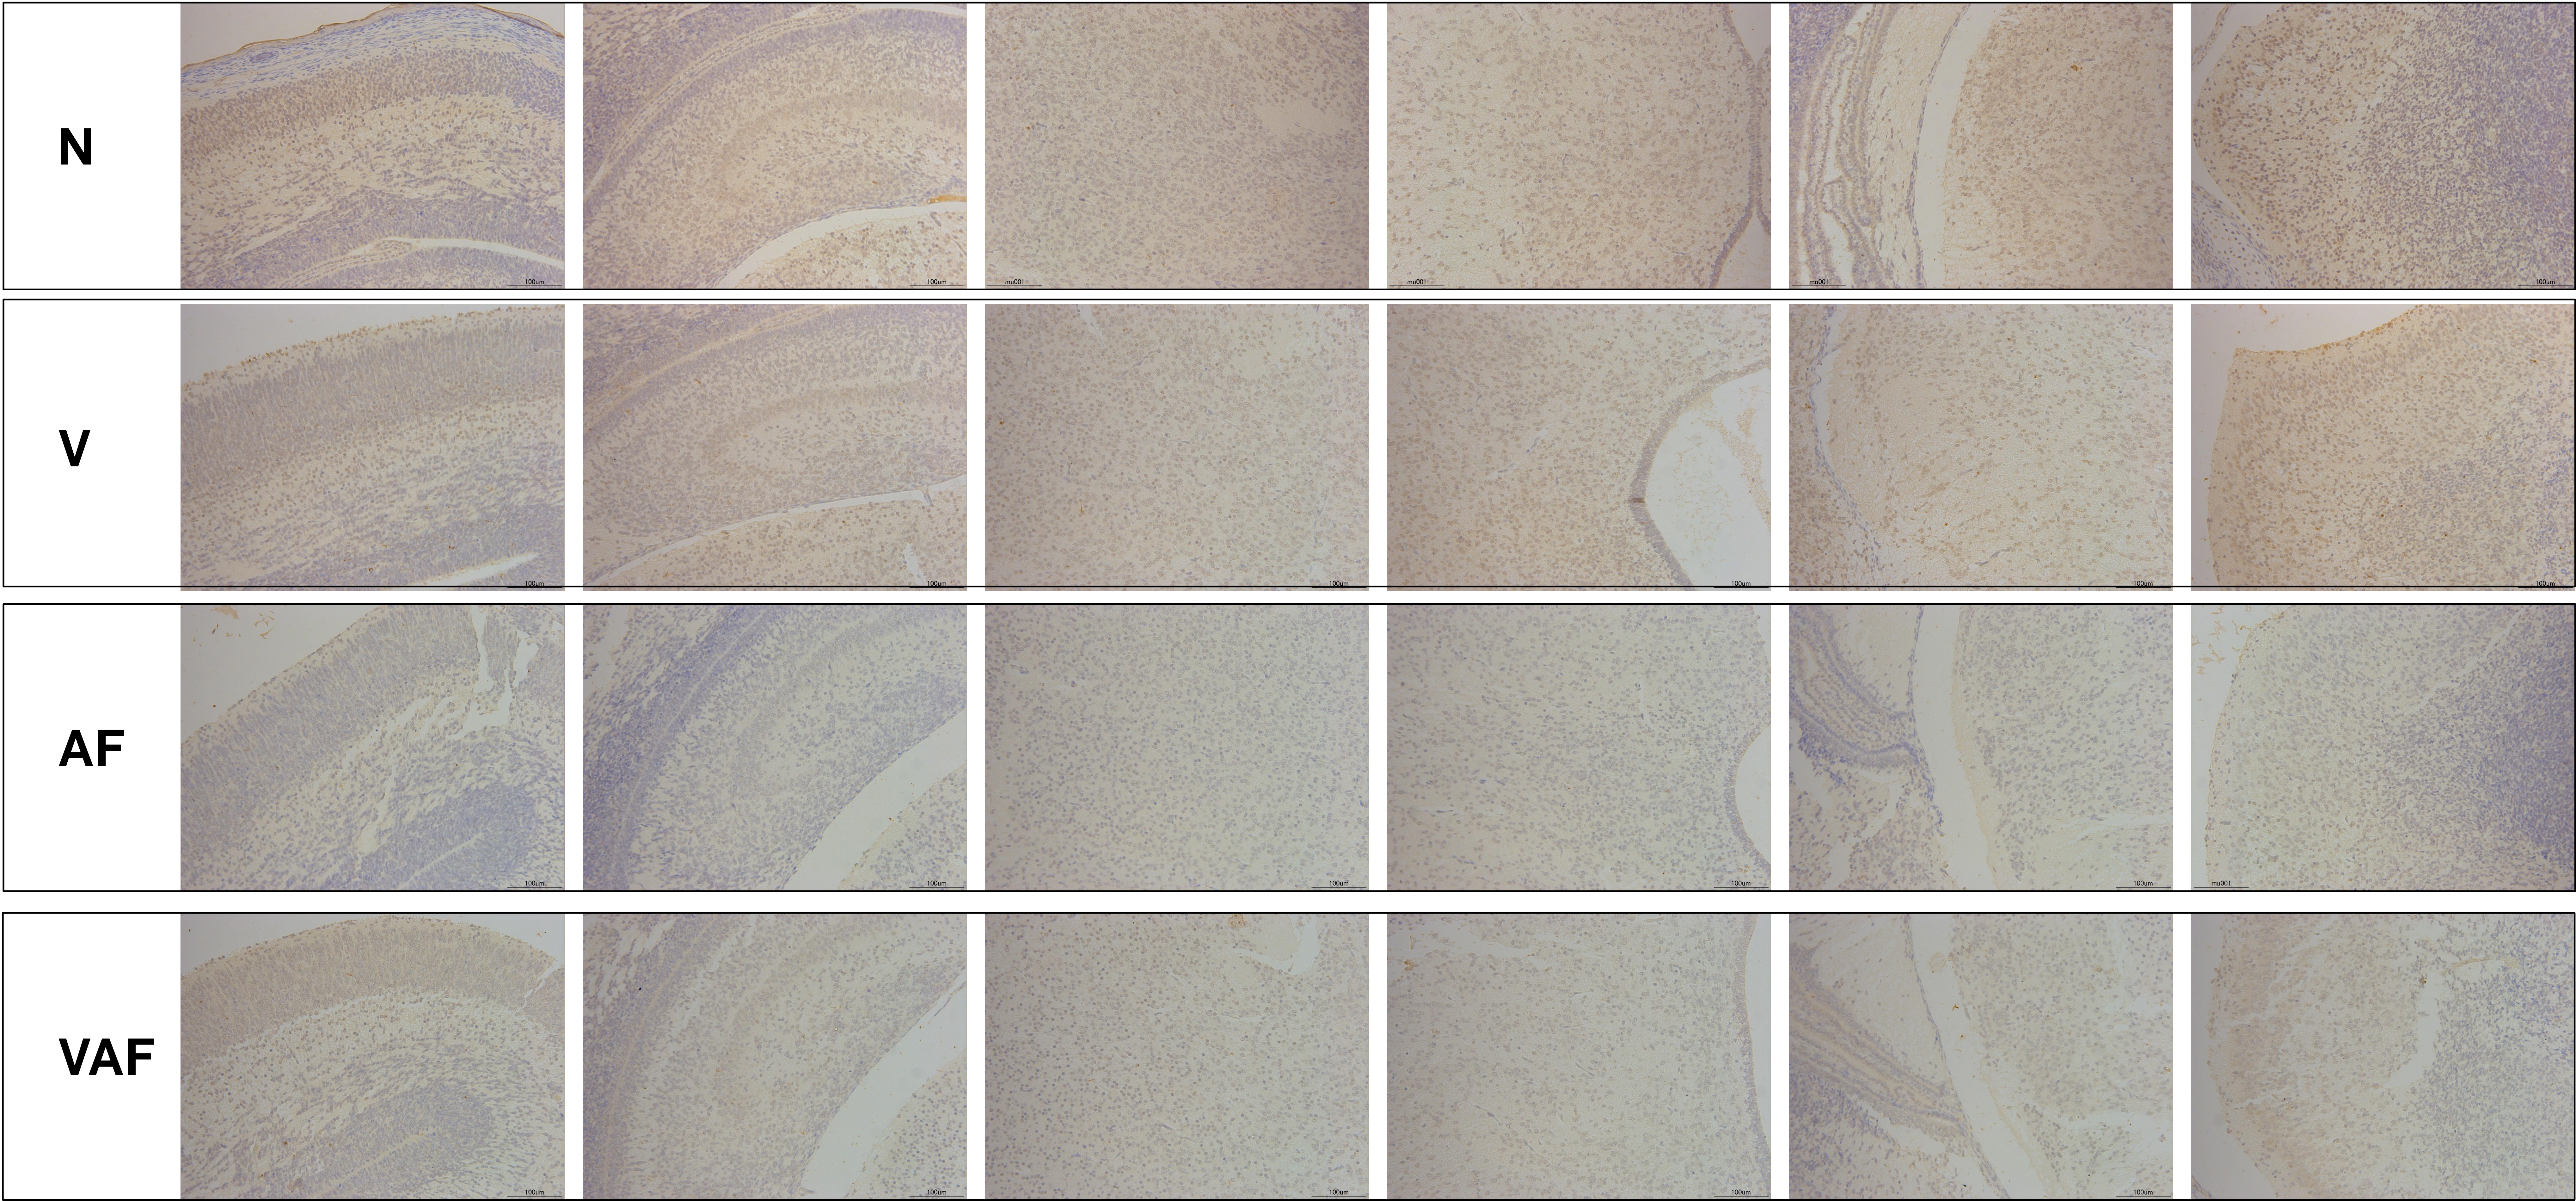



Supplementary Figure S2

a~l

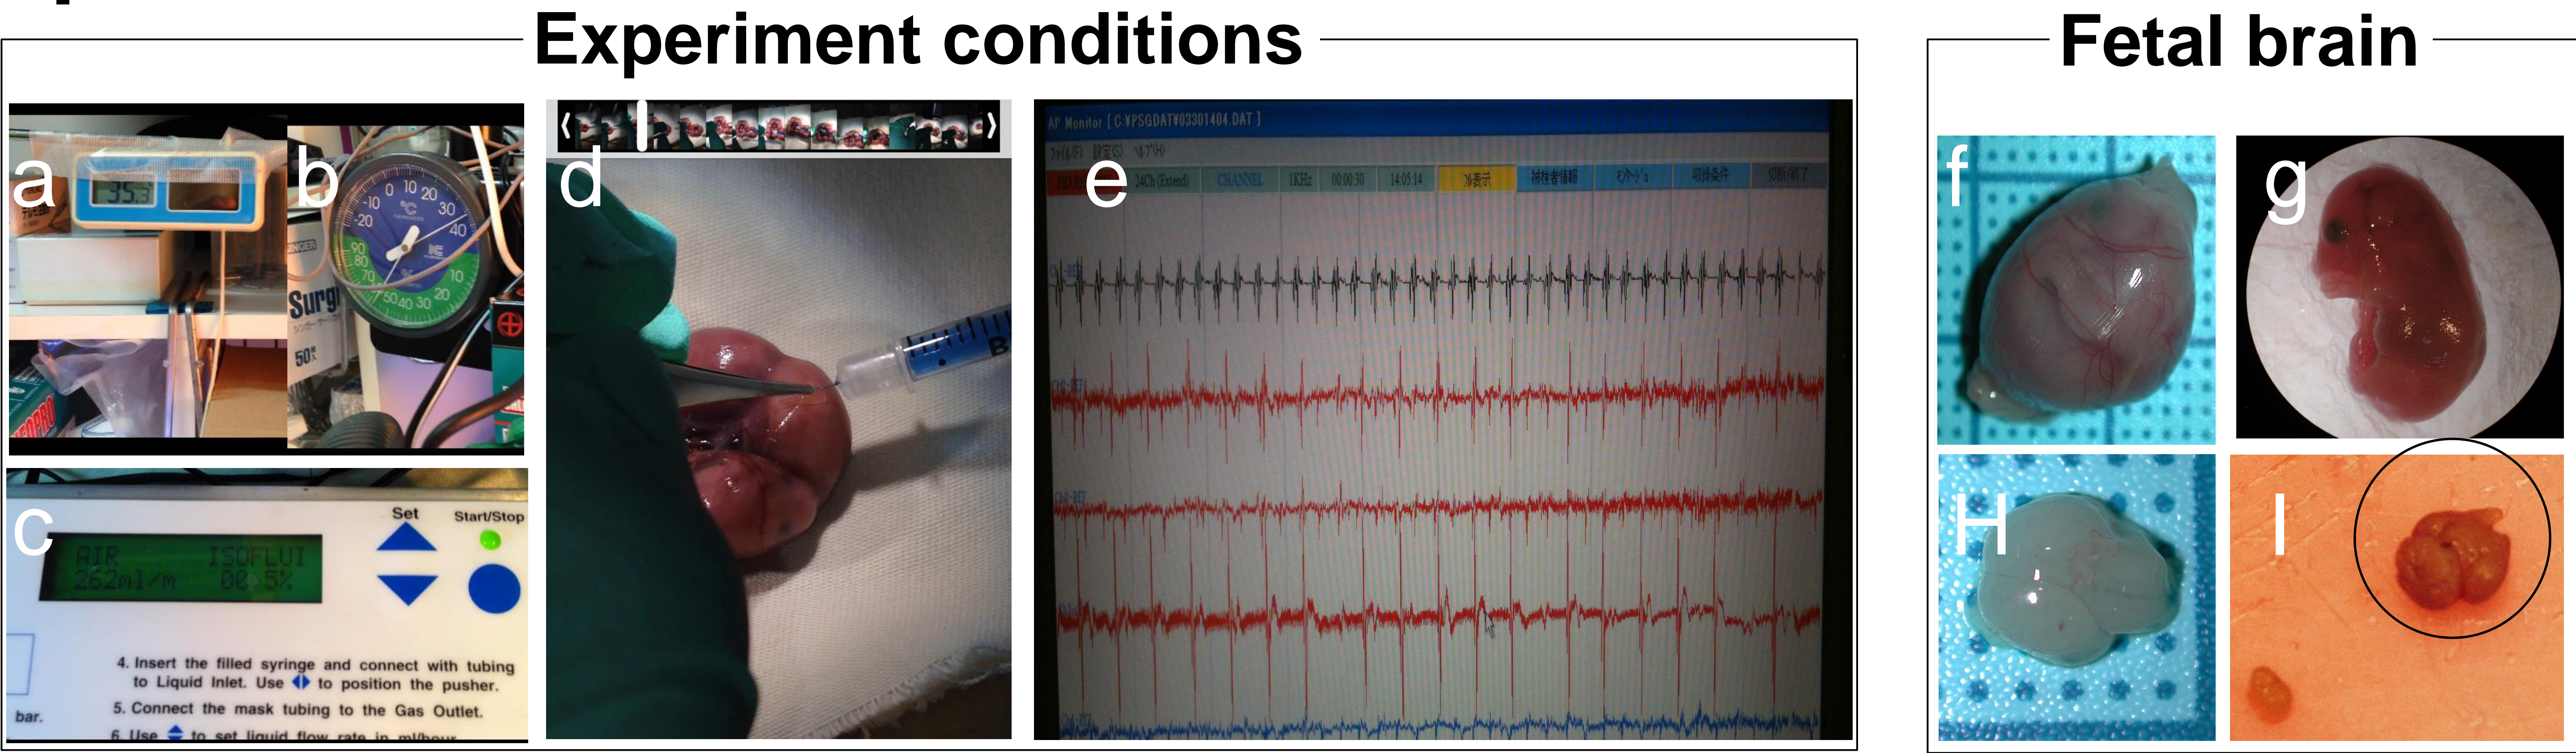

J

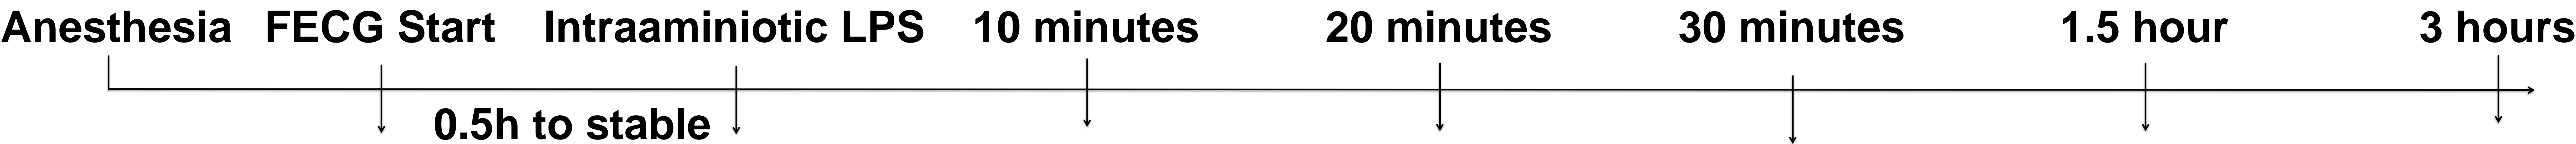

AF  
N61

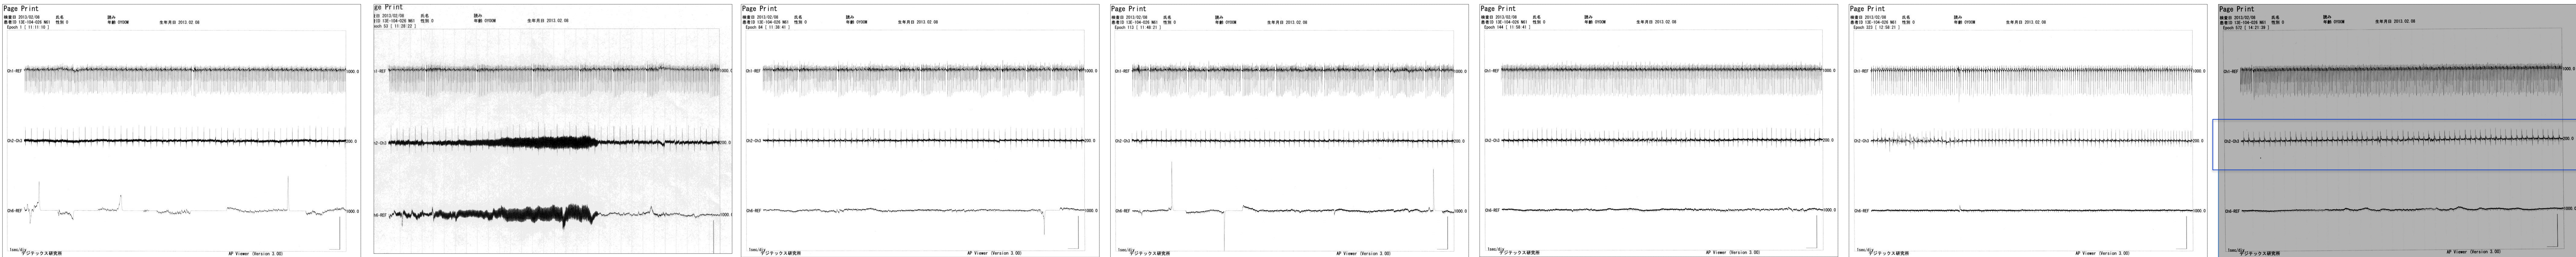

AF  
N62

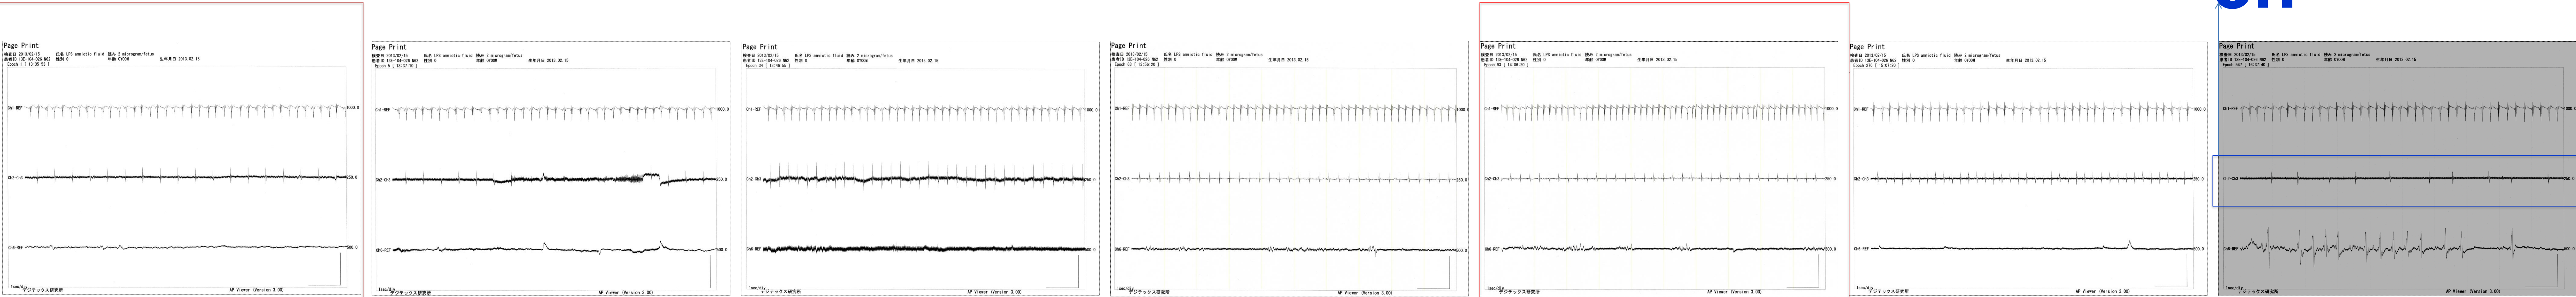

VAF  
N111

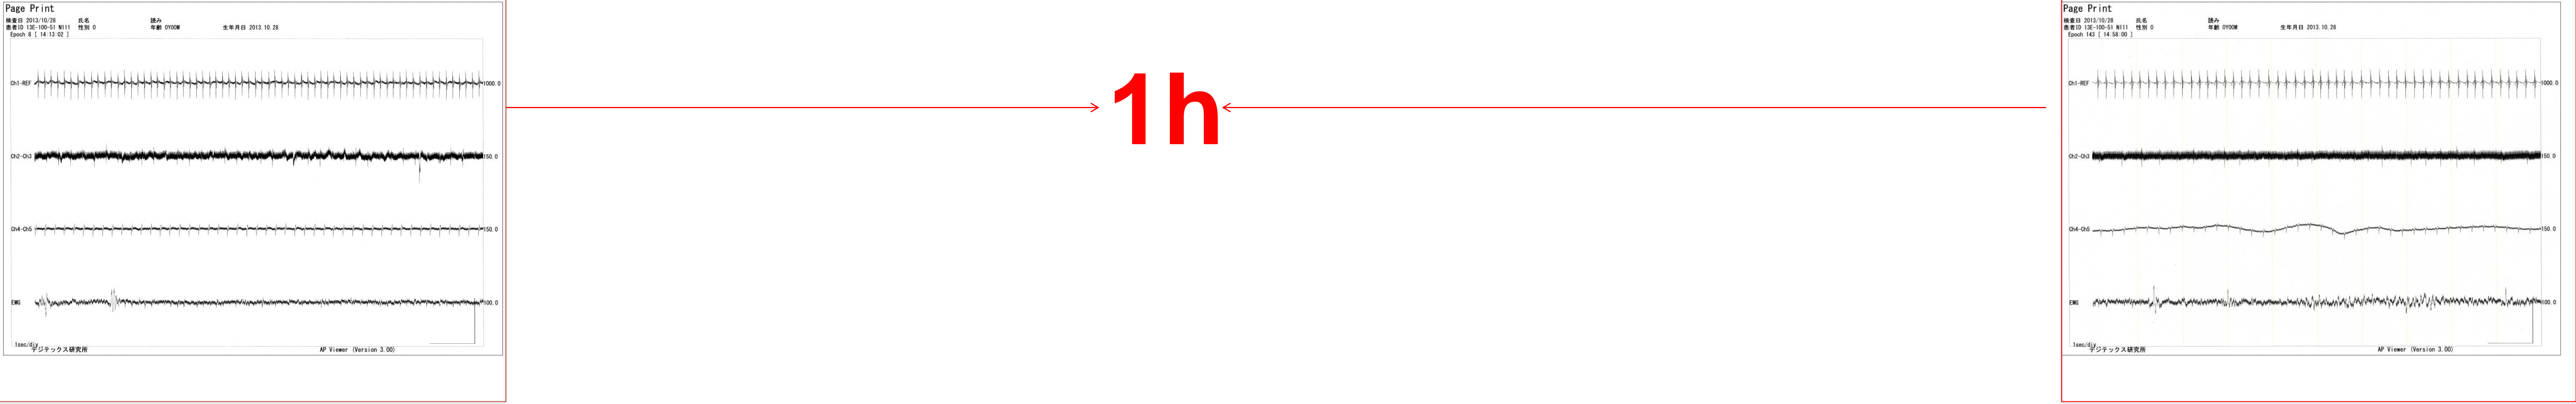

3h

1h



### **Supplementary Figure S3. All primers used in this study.**

---

|                |                            |
|----------------|----------------------------|
| mGM-csf_F444   | aagaggtagaagtcgtctctaacgag |
| mGM-csf_R593   | agtatgtctggtagtagctggctgt  |
| mTLR4_F1942    | gtggtatccactgtagcatttctg   |
| mTLR4_R2149    | agtctctgtagtgaaggcagaggt   |
| mTLR3_F2188    | ccagacatctctaaggtcactgaa   |
| mTLR3_R2399    | tgttacagaggtagtgagtggacag  |
| mTLR2_F810     | ccctcaggataggaaatgtagagac  |
| mTLR2_R976     | gcttaagtgaagagtcagggtgatg  |
| mG-csf_F706    | agcagaaagccctttccagatagt   |
| mG-csf_R872    | aagagccttctctctctgctctaag  |
| IL-6_F385_F399 | tcttctggagtaccatagctacctg  |
| IL-6_R580_R546 | ctgtgactccagcttatctgttagg  |
| TNFa_1F        | gatttgctatctcataccaggagaa  |
| TNFa_1R        | acagagcaatgactccaaagtagac  |
| IL1b_1F        | aaacggtttgtcttcaacaagatag  |
| IL1b_1R        | attccatgggtgaagtcaattatgtc |

---

**Supplementary Figure 4. All antibodies used in this study.**

| Name            | Cat. No. | MW    | Dilution folds<br>Imaging experient | Isotype |       | Dilution folds<br>W.B |
|-----------------|----------|-------|-------------------------------------|---------|-------|-----------------------|
| CreB            | 9197     | 43    | 6,400x                              | Rabbit  | IgG   | 1000x                 |
| P-CREB 488      | 9187     | 43    | 200x                                | Rabbit  | IgG   |                       |
| P-CREB          | 9191     | 43    |                                     | Rabbit  | IgG   | 1000x                 |
| JNK             | 9258     | 46/54 |                                     | Rabbit  | IgG   | 1000x                 |
| p-JNK           | 4668     | 46/54 | 50x                                 | Rabbit  | IgG   | 1000x                 |
| p38             | 9212     | 43    |                                     | Rabbit  |       | 1000x                 |
| p-p38           | 9211     | 43    | 200x                                | Rabbit  |       | 1000x                 |
| ERK1/2          | 9102     | 44/42 | 250x                                | Rabbit  | IgG   | 1000x                 |
| p-ERK1/2        | 4376     | 44/42 | 400x                                | Rabbit  |       | 1000x                 |
| Stat3           | 9139     | 79/86 |                                     | Mouse   | IgG2a | 1000x                 |
| P-stat3         | 9131     | 79/86 | 100x                                | Rabbit  |       | 1000x                 |
| NF-kB           | 4717     | 120   |                                     | Rabbit  |       | 1000x                 |
| MAP2            | ab28032  | 200   | 1000x                               | Mouse   | IgG1  | 1000x                 |
| p-S6            | 2211     | 32    |                                     | Rabbit  |       | 1000x                 |
| DJ-1            | 2134     | 22    |                                     | Rabbit  | IgG   | 1000x                 |
| Neurofilament L | 2835     | 70    | 50x                                 | Mouse   | IgG1  | 1000x                 |
| LC3a/B          | 2775     | 16/14 | 1000x                               | Rabbit  | IgG   | 1000x                 |
| alpha-synuclein | 4179     | 18    | 200x                                | Rabbit  | IgG   | 1000x                 |
| beta-actin      | 5125     | 45    | 200x                                | Rabbit  | IgG   | 1000x                 |
| ATF2            | 9221     | 70    |                                     | Rabbit  | IgG   | 1000x                 |
